# Supplementary material for: Improving the specificity of nucleic acid detection with endonuclease-actuated degradation
Source: PubMed Central journal article supplement (PMC8971390; doi:10.1038/s42003-022-03242-x), 2022-03-31
Supplement: 42003_2022_3242_MOESM3_ESM.pdf [file 42003_2022_3242_MOESM3_ESM.pdf]

## Description of Additional Supplementary Files

**File name:** Supplementary Data 1

**Description:** Raw data for figures.
